# Supplementary material for: Mesangiogenic progenitor cells are forced toward the angiogenic fate, in multiple myeloma
Source: PubMed Central journal article supplement (PMC6887577; doi:10.18632/oncotarget.27285), 2019-11-26
Supplement: oncotarget-10-6781-s001.pdf [file oncotarget-10-6781-s001.pdf]

## **Mesangiogenic progenitor cells are forced toward the angiogenic fate, in multiple myeloma**

### **SUPPLEMENTARY MATERIALS**

**Supplementary Table 1: Patients enrolled in the study.**

Abbreviations: ID Code (identification code); PC(%) (percentage of infiltrating PCs in BM); DSS (Durie-Salmon Stage); ISS (International Scoring System)

**Supplementary Table 2: Primer sets applied for gene expression profiling.**
